# Supplementary material for: A microarray-based pathogen chip for simultaneous molecular detection of transfusion–transmitted infectious agents
Source: Springer Nature journal article supplement (doi:10.1186/s12967-019-1905-4), 2019-05-14

Dengue 1 probes distribution

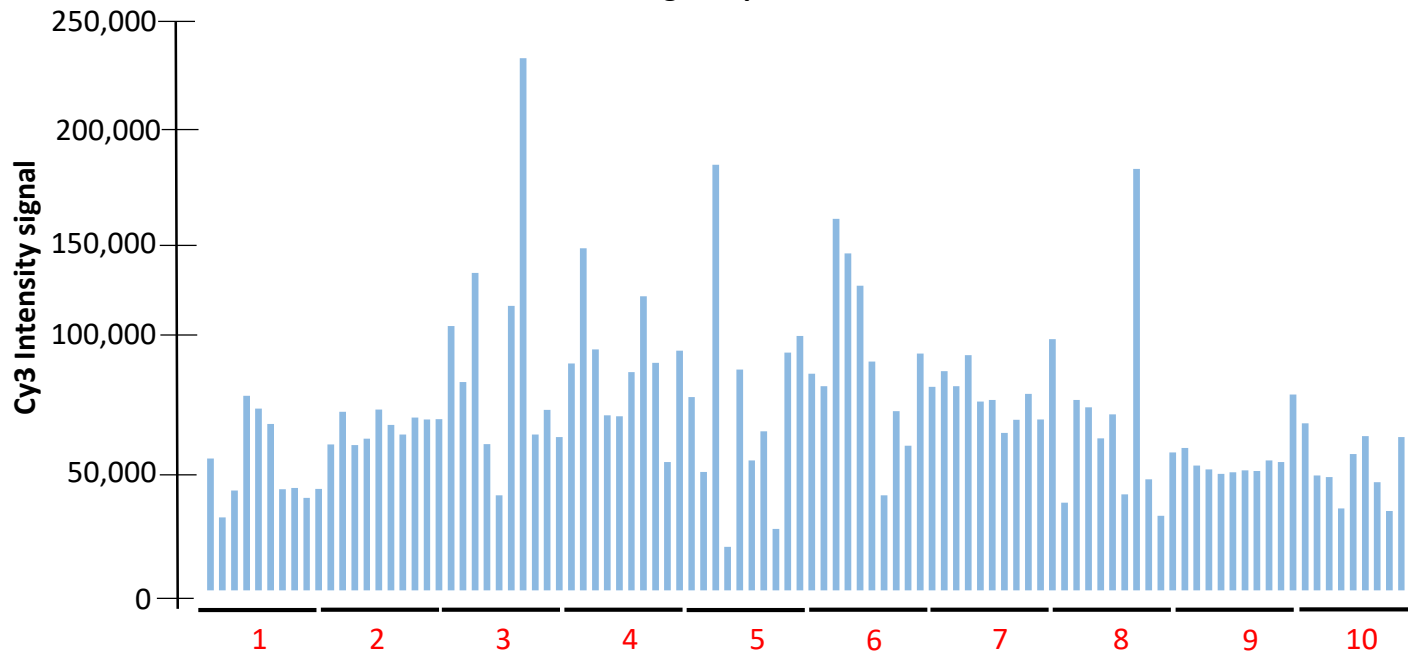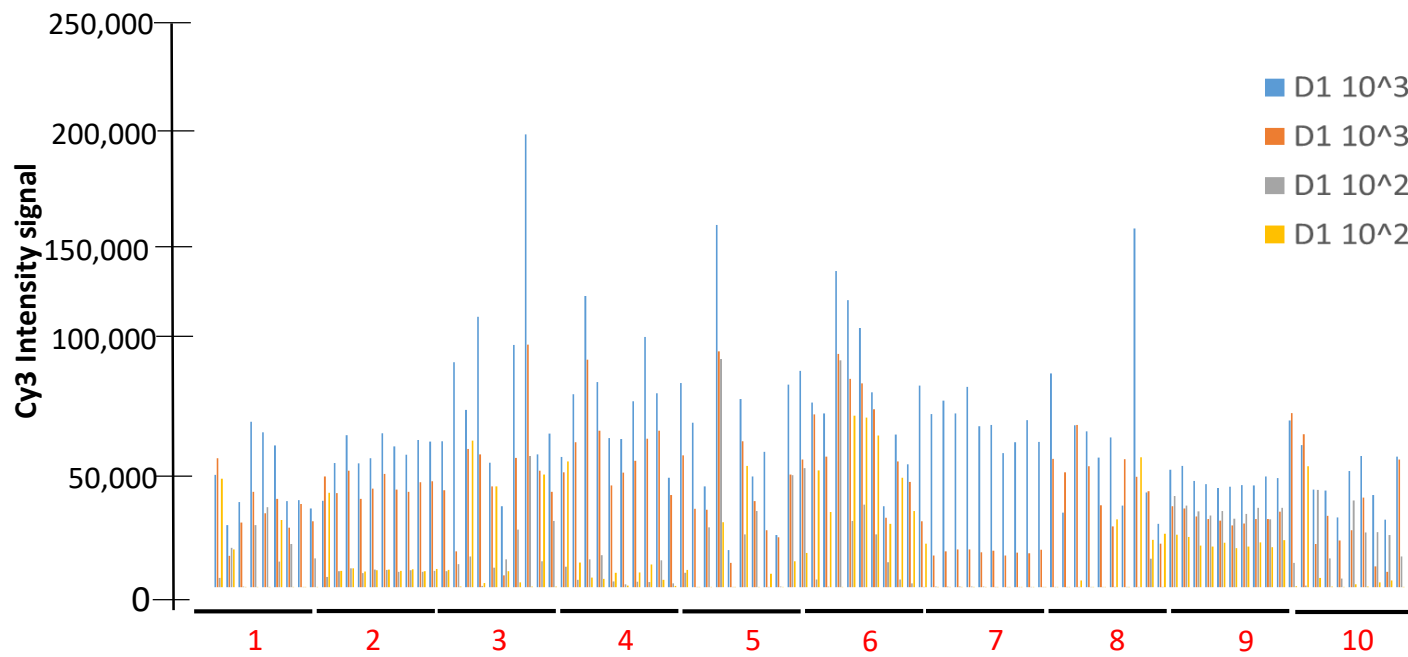

Supplement: MOESM2 [file 16723530]
