# Supplementary material for: A microarray-based pathogen chip for simultaneous molecular detection of transfusion–transmitted infectious agents
Source: Springer Nature journal article supplement (doi:10.1186/s12967-019-1905-4), 2019-05-14

### cDNA Yields

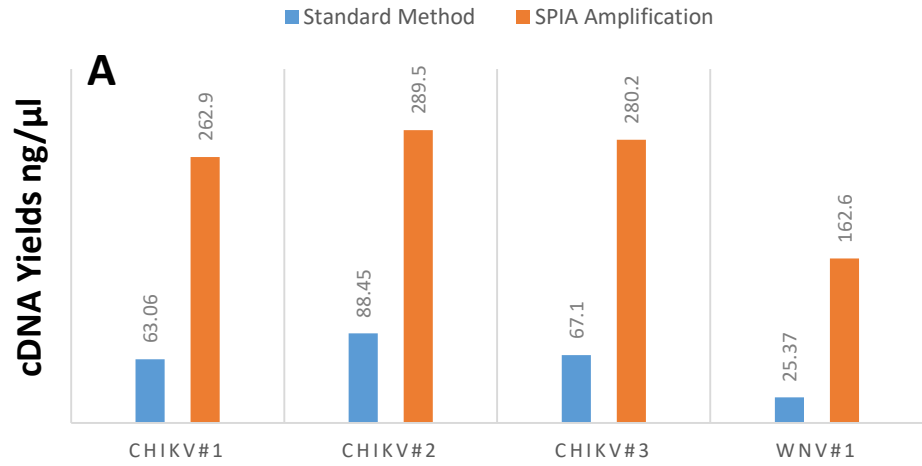

### Pathogen chip assay performance 1

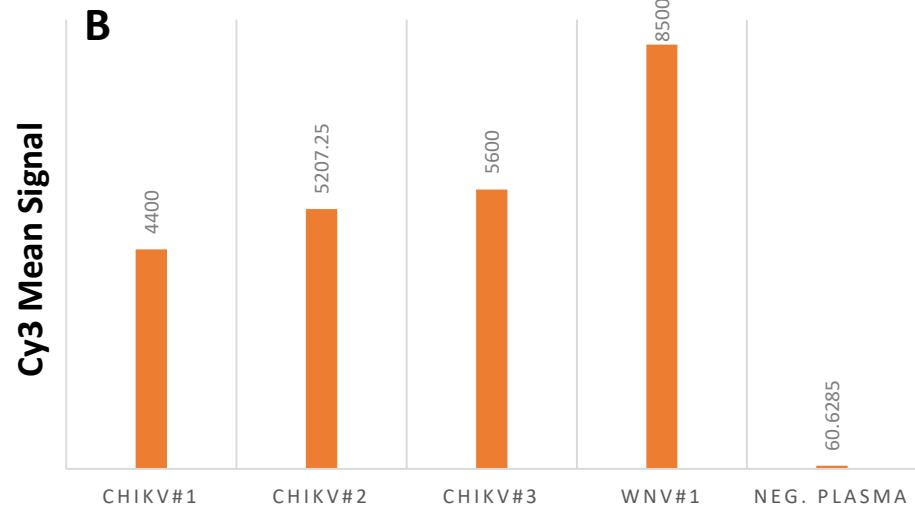

### Pathogen chip assay performance 2

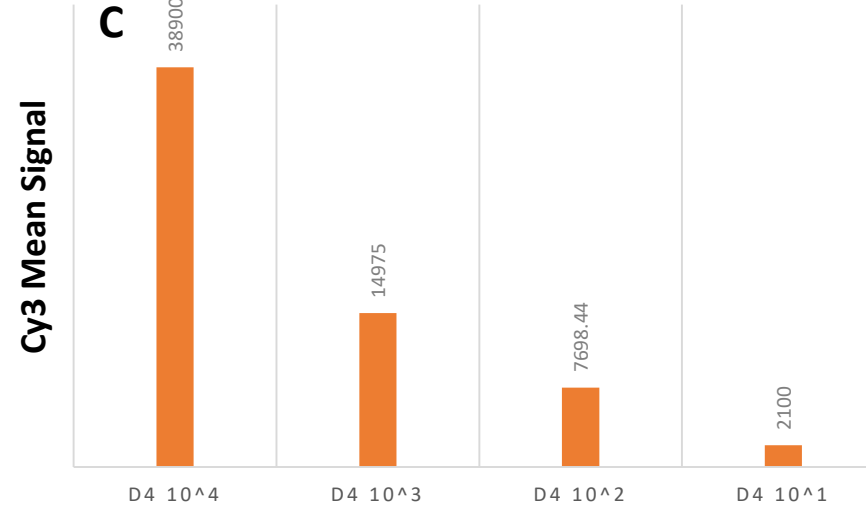

Supplement: MOESM3 [file 16723530]
